# Supplementary material for: Assessment of treatment patterns associated with injectable disease-modifying therapy among relapsing–remitting multiple sclerosis patients
Source: PubMed Central journal article supplement — Mult Scler J Exp Transl Clin. 2017 Mar 17;3(1):2055217317696114. doi: 10.1177/2055217317696114 (PMC5459267; doi:10.1177/2055217317696114), 2017-03-17
Supplement: MSO696114_supplementary_material.pdf [file MSO696114_supplementary_material.pdf]

## Supplementary Material

**Table E1.** Reasons captured for iDMT discontinuation, switch, or restart.

|                                                                                           |
|-------------------------------------------------------------------------------------------|
| Patient had a phobia about needles/self-injecting                                         |
| Patient had an injection site reaction (e.g. pain, pruritus, necrosis, lipoatrophy, etc.) |
| Patient had a systemic moderate to severe adverse event                                   |
| Patient/physician perceived a lack of efficacy                                            |
| Patient had an acute exacerbation event (i.e. relapse)                                    |
| Patient was not adherent or complained about adherence                                    |
| MRI scan or other tests indicated progressive disease                                     |
| Excessive monitoring required                                                             |
| Potential drug-drug interactions                                                          |
| Potential drug-disease interaction (interaction with current comorbidities)               |
| Excessive cost to patient                                                                 |
| Drug not covered by insurance with forced switch to covered formulary product             |
| Lab data indicated presence of neutralizing antibodies                                    |
| Other reason (specified in notes section of the abstraction report)                       |
| Unknown                                                                                   |

iDMT= injectable disease modifying therapy.

**Table E2:** Clinical outcomes of non-persistent vs persistent iDMT patients at 24 months.<sup>a</sup>

| Outcome, % of Patients                | Non-Persistent Patients<br>n=117 | Persistent Patients<br>n=183 |
|---------------------------------------|----------------------------------|------------------------------|
| Relapse                               | 48.7% <sup>b</sup>               | 31.1%                        |
| MRI indicators of disease progression |                                  |                              |

|                                                |       |       |
|------------------------------------------------|-------|-------|
| Change in lesion count                         | 12.8% | 9.8%  |
| Change in MRI evidence of new/enlarged lesions | 25.6% | 17.5% |
| Change in level of brain atrophy               | 9.4%  | 7.7%  |
| Symptoms not present at index <sup>c</sup>     |       |       |
| Abnormal gait                                  | 48.8% | 26.0% |
| Ataxia                                         | 26.2% | 12.0% |
| Cognitive deficits                             | 24.0% | 15.2% |
| Depression                                     | 34.4% | 21.7% |
| Dizziness or vertigo                           | 34.4% | 20.9% |
| Fatigue                                        | 59.5% | 47.2% |
| Bowel incontinence                             | 3.4%  | 3.3%  |
| Bladder incontinence                           | 57.5% | 30.9% |
| Tremors                                        | 10.8% | 9.2%  |
| Visual disturbances                            | 33.7% | 24.3% |
| Visual acuity                                  | 7.1%  | 5.8%  |
| Spasticity                                     | 22.7% | 19.2% |

---

iDMT= injectable disease modifying therapy.

<sup>a</sup>The study was not designed or powered to detect differences between persistent and non-persistent patients.

<sup>b</sup> $P < 0.01$  vs persistent patients.

<sup>c</sup>Incidence of symptoms within 24 months in patients who did not have symptoms at index.
